# Supplementary material for: Wide-field Intensity Fluctuation Imaging
Source: PubMed Central journal article supplement — bioRxiv. 2023 Jul 29:2023.07.29.551117. Preprint. [Version 1] doi: 10.1101/2023.07.29.551117 (PMC10402166; doi:10.1101/2023.07.29.551117), 2023-07-29
Supplement: NIHPP2023.07.29.551117v1-supplement-1.pdf [file NIHPP2023.07.29.551117v1-supplement-1.pdf]

590 **Supplementary Material**

591 **S1. Relating  $K^2(T)$  and  $g_2(\tau)$  in arbitrary modulation**

592 Define the AOM modulation function as  $m(t)$ , the intact speckle signal  
593 as  $I(t)$ , and the modulated speckle signal as  $I_m(t)$  such that

$$I_m(t) = I(t)m(t) \quad (\text{S1})$$

594 Then the intensity of pixel  $i$  on the camera sensor within intensity-modulated  
595 exposure time  $T$  would be

$$S_{i,T} = \int_0^T I_i(t')m(t')dt' \quad (\text{S2})$$

596 where  $I_i(t)$  is the intact speckle signal of pixel  $i$  and  $m(t)$  is the modulation  
597 function on the illumination intensity. The second moment of modulated pixel  
598 intensity would be

$$\langle S_T^2 \rangle = \frac{1}{N} \sum_{i=1}^N (S_{i,T})^2 \quad (\text{S3})$$

599 where  $\langle \rangle$  denotes averaging and  $N$  is the number of averaged pixels. The last  
600 material needed for the derivation is the definition of intensity autocorrelation  
601 function  $g_2(\tau)$  given by Eq. S4

$$g_2(t' - t'') = \frac{\langle I_i(t')I_i(t'') \rangle}{\langle I \rangle^2} \quad (\text{S4})$$

602 where  $\langle I \rangle$  is the average intensity of the intact speckle signal.

Based on Eq. S1 to S4, we can derive the expression of the second moment of modulated pixel intensity with respect to the intensity modulation function  $m(t)$  and the intensity autocorrelation function  $g_2(\tau)$  of the intact signal as follows:

$$\langle S_T^2 \rangle = \langle (S_{i,T})^2 \rangle$$

$\langle \rangle$  denotes averaging over independent instances

$$\begin{aligned}
 &= \langle (\int_0^T I_i(t')m(t')dt')^2 \rangle \\
 &= \langle (\int_0^T I_i(t')m(t')dt')(\int_0^T I_i(t'')m(t'')dt'') \rangle \\
 &= \langle \int_0^T \int_0^T I_i(t')I_i(t'')m(t')m(t'')dt'dt'' \rangle
 \end{aligned}$$

$m(t)$  is independent of  $i$

$$= \int_0^T \int_0^T \langle I_i(t')I_i(t'') \rangle m(t')m(t'')dt'dt''$$

Using Eq. S4

$$= \langle I \rangle^2 \int_0^T \int_0^T g_2(t' - t'')m(t')m(t'')dt'dt''$$

Symmetry of  $t'$  and  $t''$ ;  $g_2(\tau)$  is even

$$= 2\langle I \rangle^2 \int_0^T \int_0^{t'} g_2(t' - t'')m(t')m(t'')dt'dt''$$

Let  $t' - t'' = \tau$ , then  $t'' = t' - \tau$ ,  $dt'' = -d\tau$

$$= 2\langle I \rangle^2 \int_0^T \int_0^{t'} g_2(\tau)m(t')m(t' - \tau)d\tau dt'$$

Change the order of integral

$$\begin{aligned}
 &= 2\langle I \rangle^2 \int_0^T \int_{\tau}^T g_2(\tau)m(t')m(t' - \tau)dt'd\tau \\
 &= 2\langle I \rangle^2 \int_0^T g_2(\tau)(\int_{\tau}^T m(t')m(t' - \tau)dt')d\tau
 \end{aligned}$$

Let  $t = t' - \tau$ , then  $t' = t + \tau$ ,  $dt' = dt$

$$= 2\langle I \rangle^2 \int_0^T g_2(\tau)(\int_0^{T-\tau} m(t)m(t + \tau)dt)d\tau$$

603 Define

$$M(\tau) = \int_0^{T-\tau} m(t)m(t + \tau)dt \quad (\text{S5})$$

604 then

$$\langle S_T^2 \rangle = 2\langle I \rangle^2 \int_0^T g_2(\tau)M(\tau)d\tau \quad (\text{S6})$$

605 Since

$$K^2(T) = \frac{\text{Var}(S_T)}{\langle S_T \rangle^2} = \frac{\langle S_T^2 \rangle - \langle S_T \rangle^2}{\langle S_T \rangle^2} \quad (\text{S7})$$

606 where  $\langle S_T \rangle$  is the mean pixel intensity of modulated speckle signal within  
 607 exposure time  $T$  and  $\langle S_T \rangle = T\langle I_m \rangle$  where  $\langle I_m \rangle$  is the mean intensity of the  
 608 modulated speckle signal, we arrive at the expression of speckle contrast of  
 609 the within-exposure modulated speckle signal (Eq. S8).

$$K^2 = \frac{2\langle I \rangle^2}{T^2\langle I_m \rangle^2} \int_0^T g_2(\tau)M(\tau)d\tau - 1 \quad (\text{S8})$$

610 Notice that when the modulation function  $m(t)$  is a constant 1, we have  
 611  $M = T - \tau$  and Eq. S8 reduces to the expression of speckle contrast that is  
 612 commonly seen (Eq. 3). In other words, the classic expression of speckle con-  
 613 trast we use is a particular case of Eq. S8 when the illumination intensity is  
 614 held constant. Finally, we would like to introduce one important observation  
 615 about  $M(\tau)$  (Lemma S1.1).

616 **Lemma S1.1** (Integral property of  $M(\tau)$ ). *If the average intensity of the*  
 617 *intact speckle signal  $I(t)$  remains steady over time, i.e.,  $\int_0^T I(t)m(t)dt =$*   
 618  *$\langle I \rangle \int_0^T m(t)dt$ , then the integral of  $M(\tau)$  satisfies  $\frac{2\langle I \rangle^2}{T^2\langle I_m \rangle^2} \int_0^T M(\tau)d\tau = 1$ .*

619 *Proof.* Because  $I_m(t) = I(t)m(t)$ , we have

$$\frac{\int_0^T I_m(t)dt}{\int_0^T I(t)m(t)dt} = \frac{T\langle I_m \rangle}{\langle I \rangle \int_0^T m(t)dt} = 1 \quad (\text{S9})$$

620 Hence,

$$\int_0^T m(t)dt = \frac{T\langle I_m \rangle}{\langle I \rangle} \quad (\text{S10})$$

621 Therefore,

$$\begin{aligned}
 \int_0^T M(\tau) d\tau &= \int_0^T \int_0^{T-\tau} m(t)m(t+\tau) d\tau dt \\
 &= \int_0^T m(t) \int_0^{T-t} m(t+\tau) d\tau dt \\
 \text{Let } t' &= t + \tau, \text{ then } dt' = d\tau \\
 &= \int_0^T m(t) \int_t^T m(t') dt' dt \\
 &= \int_0^T \int_t^T m(t)m(t') dt' dt \tag{S11}
 \end{aligned}$$

Symmetry of  $m(t)$  and  $m(t')$

$$\begin{aligned}
 &= \frac{1}{2} \int_0^T \int_0^T m(t)m(t') dt' dt \\
 &= \frac{1}{2} \left( \int_0^T m(t) \right)^2
 \end{aligned}$$

Plug in Eq. S10

$$= \frac{T^2 \langle I_m \rangle^2}{2 \langle I \rangle^2}$$

622 Namely,  $\frac{2\langle I \rangle^2}{T^2 \langle I_m \rangle^2} \int_0^T M(\tau) d\tau = 1$ . The proof is over.  $\square$

623 **S2.**  $\mathbf{K}_{2P}^2(\mathbf{T}) = \frac{1}{2} \mathbf{g}_2(\mathbf{0}) + \frac{1}{2} \mathbf{g}_2(\mathbf{T}) - \mathbf{1}$  if  $\mathbf{m}(t) = \delta(\mathbf{0}) + \delta(\mathbf{T})$

624 *Proof.* Denote  $I(t)$  as  $I$  and  $I(t+\tau)$  as  $I_\tau$ , then according to  $g_2(\tau) = \frac{\langle I(t)I(t+\tau) \rangle}{\langle I \rangle^2}$   
 625 we have

$$g_2(0) = \frac{\langle I^2 \rangle}{\langle I \rangle^2} \tag{S12}$$

626 and

$$g_2(\tau) = \frac{\langle I \cdot I_\tau \rangle}{\langle I \rangle^2} \tag{S13}$$

627 Since  $\text{Var}(I) = \langle I^2 \rangle - \langle I \rangle^2$  and  $\text{Cov}(I, I_\tau) = \langle I \cdot I_\tau \rangle - \langle I \rangle^2$  where  $\text{Var}(X)$   
 628 and  $\text{Cov}(X, Y)$  denote the variance of  $X$ , and the covariance between  $X$  and

629  $Y$ , we have

$$\begin{aligned} \frac{1}{2}g_2(0) + \frac{1}{2}g_2(\tau) - 1 &= \frac{1}{2}\left(\frac{\langle I^2 \rangle}{\langle I \rangle^2} - 1\right) + \frac{1}{2}\left(\frac{\langle I \cdot I_\tau \rangle}{\langle I \rangle^2} - 1\right) \\ &= \frac{\text{Var}(I) + \text{Cov}(I, I_\tau)}{2\langle I \rangle^2} \end{aligned} \quad (\text{S14})$$

630 If  $m(t) = \delta(0) + \delta(\tau)$ , the pixel intensity  $S$  would be  $S = I + I_\tau$  and  $K_{2P}^2(\tau)$   
631 would be

$$K_{2P}^2(\tau) = \frac{\text{Var}(I + I_\tau)}{\langle I + I_\tau \rangle} = \frac{\text{Var}(I + I_\tau)}{4\langle I \rangle^2} \quad (\text{S15})$$

632 Therefore, to prove that  $K_{2P}^2(\tau) = \frac{1}{2}g_2(0) + \frac{1}{2}g_2(\tau) - 1$ , based on Eq. [S14](#) and  
633 [S15](#), one only needs to prove that  $\text{Var}(I + I_\tau) = 2\text{Var}(I) + 2\text{Cov}(I, I_\tau)$ ,  
634 which is true since  $\text{Var}(I + I_\tau) = \text{Var}(I) + \text{Var}(I_\tau) + 2\text{Cov}(I, I_\tau)$  and  
635  $\text{Var}(I) = \text{Var}(I_\tau)$ . The proof is over.

636

□

### 637 **S3. The Impact of Non-zero Residual Illumination**

638 We can model the non-zero residual illumination in 2-pulse modulation  
639 as

$$m'(t) = (1 - r)m(t) + r \quad (\text{S16})$$

640 where  $r$  is the relative amplitude of residual illumination during the off state  
641 and ranges from 0 to 1.  $m(t)$  here is the ideal 2-pulse modulation with zero  
642 residual illumination, and ranges between 0 and 1. Then the modulation  
643 autocorrelation function would be

$$\begin{aligned} M'(\tau) &= \int_0^{T-\tau} m'(t)m'(t+\tau)dt \\ &\approx (1 - r)^2 M(\tau) + (T - \tau)[2r(1 - r)d + r^2] \end{aligned} \quad (\text{S17})$$

644 where  $M(\tau) = \int_0^{T-\tau} m(t)m(t+\tau)dt$  and  $d$  is the duty cycle of  $m(t)$  or the  
645 pseudo duty cycle of  $m'(t)$ . Fig. [S1a](#) shows an example of how  $M(\tau)$  would  
646 be skewed in presence of a non-zero residual illumination ( $r=0.1$ ). The square

647 of speckle contrast corresponding to  $m'(t)$  would then become

$$\begin{aligned}
 \tilde{K}^2(T) &= \frac{2\langle I \rangle^2}{T^2\langle I_{m'} \rangle^2} \int_0^T g_2(\tau)M'(\tau)d\tau - 1 \\
 &= \frac{2}{T^2[d + (1-d)r]^2} \int_0^T g_2(\tau)M'(\tau)d\tau - 1 \\
 &= \frac{2}{T^2[d + (1-d)r]^2} \int_0^T g_2(\tau)[(1-r)^2M(\tau) + (T-\tau)(2r(1-r)d + r^2)]d\tau - 1
 \end{aligned}
 \tag{S18}$$

648 Simplify Eq. S18, we get

$$\tilde{K}^2(T) = p K_m^2 + (1-p)K_0^2 \tag{S19}$$

649 where  $K_m^2 = \frac{2\langle I \rangle^2}{T^2\langle I_m \rangle^2} \int_0^T g_2(\tau)M(\tau)d\tau - 1$ ,  $K_0^2 = \frac{2}{T^2} \int_0^T (T-\tau)g_2(\tau)d\tau - 1$ , and  
 650  $p = \frac{d^2(1-r)^2}{[r+d(1-r)]^2}$ . Therefore, the square of speckle contrast,  $K^2$  in presence of a  
 651 non-zero residual illumination in 2-pulse modulation would be the weighted  
 652 sum of that of an ideal 2-pulse modulation plus that of no modulation on  
 653 intensity.  $p$  indicates the proportion of the contribution by the ideal 2-pulse  
 654 modulation. It is noticed that when  $r$  increases,  $p$  drops and that when  $d$   
 655 increases,  $p$  rises. Fig. S1b shows an example of how an AOM with limited  
 656 OD when gating the light would affect the tail of  $K_{2P}^2(T)$  curves when  $T$  is  
 657 large.

#### 658 **S4. The impact of pulse duration on the accuracy of measuring** 659 **absolute and relative values of $g_2(\tau)$**

660 In this section, we would like to answer the question of how to choose the  
 661 pulse duration when doing 2-pulse modulated multiple exposure imaging. We  
 662 demonstrated the validity of a 10  $\mu$ s pulse duration in extracting correlation  
 663 times as short as 30  $\mu$ s (Fig. 3f). But it does not have to be always the case.  
 664 The pulse duration can be longer when measuring  $g_2(\tau)$  of slowly varying  
 665 signals. We examined the optimal pulse duration selection through numerical  
 666 simulation. For a given pulse duration  $T_m$ , we evaluated the discrepancy  
 667 between  $g_2(\tau)$  and its estimation by  $K_{2P}^2(T)$  at various correlation times (Fig.  
 668 S5). For a given pulse duration, the maximum percent discrepancy between  
 669  $2[K_{2P}^2(\tau) - C]$  and the absolute value of  $g_2(\tau)$  decreases as  $\tau_c$  increases (Fig.

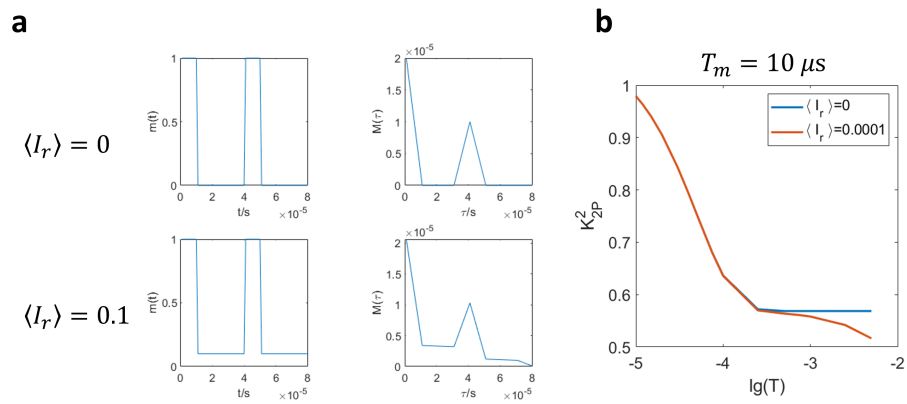

Figure S1: The impact of non-zero residual illumination between two illumination pulses on  $K_{2P}^2(T)$ . **a** How the modulation autocorrelation function  $M(\tau)$  would be skewed by a non-zero residual illumination ( $r=0.1$ ). **b** The comparison of  $K_{2P}^2(T)$  curves with and without residual illumination. An AOM with an OD of 4 when gating the light is simulated for the former case.

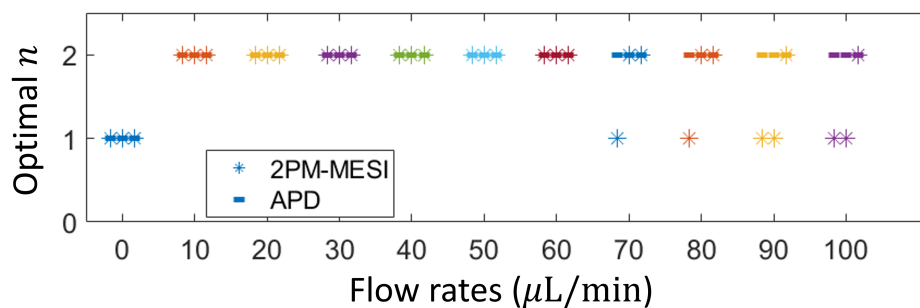

Figure S2: The optimal  $n$  given by the fitting algorithm in various flow rates. Dashed line: APD. Asteroids: 2PM-MESI. For each flow rate, the experiment is repeated for five times. Three of the five repeats are shown here and grouped together by the same color in the plot. Different colors represent different flow rates. When the flow rate is zero, the optimal  $n$  is 1, which is true for both APD and 2PM-MESI fitting results. When the flow rate is not zero, the optimal  $n$  is 2 according to APD fitting results. 2PM-MESI identifies the same optimal  $n$  for small flow rates ( $\leq 60 \mu L/min$ ). But for higher flow rates, instability in estimating the optimal  $n$  is observed, which could be due to the downticking tail of the  $K_{2P}^2$  curve induced by the non-zero residual illumination between illumination pulses.

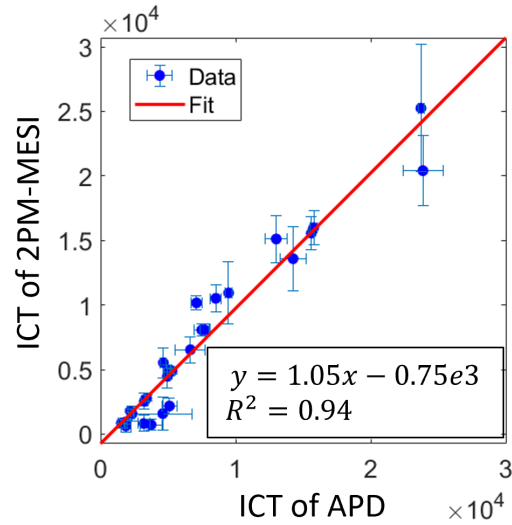

Figure S3: Comparison of ICT values extracted from  $g_2(\tau)$  and  $K_{2P}^2(T)$  curves *in vivo* with unfixed  $n$ . 28 points from 4 mice.

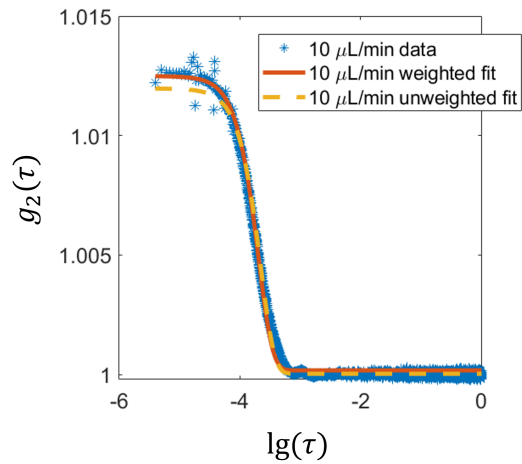

Figure S4: Comparison of the performance of weighted fitting vs. unweighted fitting. The weighted fitting by  $1/\tau$  improves the fitting performance in the head of  $g_2(\tau)$  curve compared with unweighted fitting.



670 S5a). When  $\tau_c$  becomes larger than 10 times  $T_m$ , the percentage discrepancy  
 671 drops below 0.2%. In other words, to recover the absolute value of  $g_2(\tau)$   
 672 of the signal of interest within a maximum of 0.2% discrepancy threshold, the  
 673 pulse duration  $T_m$  should be made shorter than 10% of the correlation time  
 674  $\tau_c$  of the signal. On the other hand, if the correlation time is the only interest  
 675 about  $g_2(\tau)$ , i.e., the relative value of  $g_2(\tau)$  or  $\tilde{g}_2(\tau)$  is of interest, then the  
 676 pulse duration can be longer than 10% of  $\tau_c$  (Fig. S5b). But considering that  
 677 2-pulse modulated multiple exposure imaging can only capture  $g_2(\tau)$ 's shape  
 678 in the range of  $\tau \geq T_m$ , it is recommended that  $T_m$  not be longer than  $\tau_c$  to  
 679 ensure sufficient sampling of the exponential-decay phase of  $g_2(\tau)$ .

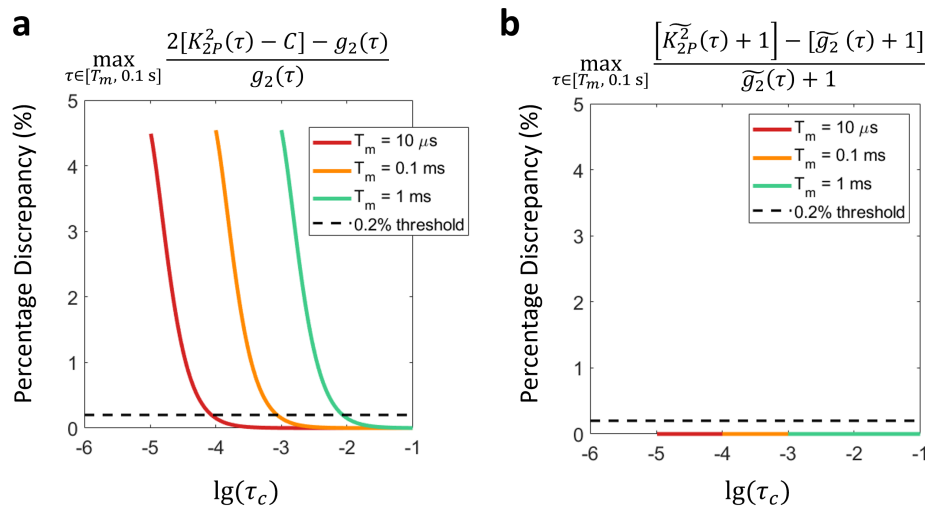

Figure S5: The accuracy of estimating  $g_2(\tau)$  and  $\tilde{g}_2(\tau)$  based on  $K_{2P}^2(T)$  for signals of different correlation times. **a** The maximum percentage discrepancy between absolute  $g_2(\tau)$  and that estimated by  $K_{2P}^2(T)$ . The  $y$ -axis is  $\max_{\tau \in [T_m, 0.1 \text{ s}]} \frac{2[K_{2P}^2(\tau) - C] - g_2(\tau)}{g_2(\tau)} / \%$ . **b** The maximum percentage discrepancy between normalized  $g_2(\tau)$  and  $K_{2P}^2(\tau)$ . The  $y$ -axis is  $\max_{\tau \in [T_m, 0.1 \text{ s}]} \frac{[K_{2P}^2(\tau) + 1] - [\tilde{g}_2(\tau) + 1]}{\tilde{g}_2(\tau) + 1} / \%$ .
